# Supplementary material for: Over-expression of CcMYB24, encoding a R2R3-MYB transcription factor from a high-leaf-number mutant of Cymbidium, increases the number of leaves in Arabidopsis
Source: PeerJ. 2023 May 31;11:e15490. doi: 10.7717/peerj.15490 (PMC10239231; doi:10.7717/peerj.15490)
Supplement: Supplemental Information 3 [file peerj-11-15490-s003.xlsx]

## Sheet: Supplementary Table S1
Table S1. Primers used in this study
Experiment	Primer name	Sequence 5’- 3’
Gene cloning and genetic tranformation	CcMYB24-BamHIF	GCAGGTCGACTCTAGAGGATCCATGGGGAGGGCTCCTTGC
	CcMYB24-SacIR	GGAATTCGAGCTGGTCAGAGCTCTCAAAAAGTGCTCATACTCTTCCA
Subcellular localization	35S-CcMYB24-EcoRIF	CAAGAGACAGGATCCGAATTCATGGGGAGGGCTCCTTGCTGT
	35S-CcMYB24-SalIR	CATCGGTGCACTAGTGTCGACAAAAGTGCTCATACTCTTCC
qRT-PCR	20OV46-F3	TGGTCTATGGCAACACAGGG
	20OV46-R3	TCCATTGGCTGTTACACCCTT
	AtUBQ5 F	ACATTGTCGATGGTGTCGGATG
	AtUBQ5 R	CGTTGCCTCAAAAGATGCAGATC
	MYB24-F	CTACTGGAACACGCACCTAAA
	MYB24-R	CATCGACAGAGGAAATGGAGTC
	18S rRNA F	CGGCGAGAAGTCCATTGAACC
	18S rRNA R	TCACCTACGGAAACCTTGTTACG

## Sheet: Supplementary Table S2
Table S2. The raw data of qPCR for CcMYB24 gene in leaf of TRIR-1 and TRIR-2 , genetically transformed (OE) and WT Arabidopsis
Individual	biological replications	Cq value of target gene	Cq value of internal reference gene
TRIR-1	1	20.37	18.73
	2	20.46	18.52
	3	20.36	18.33
TRIR-2	1	19	18.24
	2	19.99	18.56
	3	20.38	18.46
Stem of OE Arabidopsis	1	15.3	19.64
	2	15.38	19.43
	3	15.38	19.22
Stem of WT Arabidopsis	1	33.65	19.45
	2	34.8	19.5
	3	34.09	19.59
Leaf of OE Arabidopsis	1	13.93	19.82
	2	13.67	19.63
	3	13.67	19.7
Leaf of WT Arabidopsis	1	34.15	19.42
	2	34.19	19.57
	3	34.22	19.41
Flower of OE Arabidopsis	1	14.64	19.83
	2	14.6	19.79
	3	14.67	19.85
Flower of WT Arabidopsis	1	35.46	19.48
	2	35.57	19.41
	3	35.79	19.45

## Sheet: Supplementary Table S3
Table S3. Raw data and statistical reporting of variation in morphological traits between ‘TRIR-2’ and ‘TRIR-1’
	Traits	Height (cm)			Length of leaves (cm)			Breadth of leaves (cm)			Number of leaves
	Individual	TRIR-1	TRIR-2		TRIR-1	TRIR-2		TRIR-1	TRIR-2		TRIR-1	TRIR-2
	1	17.5	10.3		10.8	6.65		0.7	0.7		5	7
	2	14	10.2		10.2	5.45		0.6	0.8		7	8
	3	16	10.5		9.8	6.44		0.5	0.8		8	9
	4	12.5	8.5		9.7	5.58		0.4	0.7		7	9
	5	10	7.8		10.9	5.55		0.4	0.6		7	8
	6	12	9.2		8.88	4.32		0.5	0.7		7	11
	7	6.7	6.4		8.55	6.15		0.35	0.4
	8	8.2	7		9.23	5.08		0.5	0.4
	9				8.98	5.49		0.3	0.5
Average		12.1125	8.7375		9.67111	5.63444		0.472222	0.622222		6.83333	8.66667
Statistical Reporting
method: Student’s t-test	df	14			16			16			10
	F	4.11			0.568			0.983			0.766
	p	0.033			<0.01			0.039			0.024

## Sheet: Supplementary Table S4
Table S4. Raw data and statistical reporting of variation in number of leaves and branches between genetically transformed (OE) and WT Arabidopsis
	Traits	Number of branches			Number of leaves
	Individual	WT	OE		WT	OE
	1	1	1		12	13
	2	1	1		11	15
	3	2	1		14	14
	4	1	2		13	20
	5	1	3		12	24
	6	2	1		14	16
	7	1	1		11	16
	8	1	1		12	18
	9	1	2		11	20
	10	1	2		12	20
	11	1	1		12	13
	12	1	2		10	19
	13	1	1		12	14
	14	1	2		12	21
	15	1	1		11	16
	16	1	2		13	13
	17	1	1		12	14
	18	1	1		12	13
	19	1	1		10	14
	20	1	1		12	13
	21	1	1		12	12
	22	1	1		11	14
	23	1	1		12	13
Average		1.08696	1.34783		11.8696	15.8696
Statistical Reporting
method: Student’s t-test	df	44			44
	F	17.384			25.332
	p	0.057			<0.01

## Sheet: Supplementary Table S5
Table S5. Raw data and statistical reporting of variation in physiological traits between genetically transformed (OE) and WT Arabidopsis
	Traits	chlorophyll a (mg/g)			chlorophyll b (mg/g)			total chlorophyll (mg/g)			total carotenoids (mg/g)			soluble sugar (%)			soluble protein (mg/g)			total flavonoid (mg/g)
	Individual	WT	OE		WT	OE		WT	OE		WT	OE		WT	OE		WT	OE		WT	OE
	1	1.87498	2.00369		0.479768	0.526347		2.35474	2.53004		0.435472	0.397196		1.03101	0.882278		5.96857	4.96857		1.49674	1.07631
	2	1.86512	2.03211		0.488572	0.52887		2.35369	2.56098		0.423972	0.398919		0.944937	0.912025		7.49714	5.89714		1.58083	1.1604
	3	1.89073	2.03235		0.511225	0.547742		2.40195	2.58009		0.426419	0.394712		1.08861	0.925316		6.34	4.89714		1.49674	0.992222
Average		1.87694	2.02272		0.493188	0.53432		2.37013	2.55704		0.428621	0.396942		1.02152	0.90654		6.6019	5.25429		1.52477	1.07631
Statistical Reporting
method: Student’s t-test	df	4			4			4			4			4			4			4
	F	0.52			0.45			0.13			4.33			2.58			0.62			0.4
	p	<0.01			0.024			<0.01			<0.01			0.058			0.07			<0.01
